# Supplementary material for: Phenoxazine-based covalent organic frameworks as a turn-off fluorescent probe for trace water detection in organic solvents
Source: Royal Society of Chemistry journal article supplement (doi:10.1039/d4cc06620k), 2025-01-01
Supplement: d4cc06620k1.pdf [file d4cc06620k1.pdf]

## **Electronic Supplementary Information**

### **Phenoxazine-Based Covalent Organic Frameworks as A Turn-Off Fluorescent Probe for Trace Water Detection in Organic Solvents**

Fengmin Cui, Yingdi Zhang, Benhai Liu, Zerong Jing and Ya Du\*

Institute of Advanced Synthesis, School of Chemistry and Molecular Engineering, Nanjing Tech University, Nanjing 211816, China. E-mail: [ias\\_ydu@njtech.edu.cn](mailto:ias_ydu@njtech.edu.cn)

## Materials and general procedures

Tetrahydrofuran (THF), methanol (MeOH), hexane, ethyl acetate (EA), dichloromethane (DCM), petroleum ether (PE),  $\text{CHCl}_3$ , hydrazine hydrate ( $\text{N}_2\text{H}_4\cdot\text{H}_2\text{O}$ ) and potassium hydroxide (KOH) were purchased from Nanjing WANQING chemical Glass ware & Instrument. Dimethyl formamide (DMF), dimethyl sulfoxide (DMSO) and acetonitrile were purchased from J&K. 1,2-Dichlorobenzene (*o*-DCB) and *n*-butanol were purchased from Energy Chemical. 1,3,5-Trimethylbenzene (Mesitylene) were purchased from Aladdin. THF were dried by distillation from Na/benzophenone. All other chemicals were obtained from commercial sources. Unless stated otherwise, the reactions were performed under an atmosphere of dry nitrogen. 2,4,6-Tris(4-formylphenyl)benzene (TFPB)<sup>1</sup> and 2,4,6-tris(4-formylphenyl)triazine (TFPT)<sup>2</sup> were synthesized according to a literature procedure.

All liquid state NMR measurements were performed on a JEOL ECZ 400S 400 MHz spectrometer (magnetic field 9.4 T). Chemical shifts ( $\delta$ ) are given in ppm relative to TMS. PXRD patterns were recorded on a Rigaku Smart Lab 3kW with a scanning speed of  $20^\circ \text{ min}^{-1}$  and a step size of  $0.02^\circ$  in  $2\theta$ . TGA experiments were performed on a Rigaku Smart Lab 3kW under air from room temperature to  $800^\circ \text{ C}$  at a ramp rate of  $10^\circ \text{ C/min}$ . SEM images were recorded on a Quanta 250 FEG scanning electron microscope. FT-IR spectra were measured on a ThermoFisher IS10 FT-IR with pure KBr pellets. Nitrogen sorption isotherms were measured at  $77 \text{ K}$  with a Quantachrome Autosorb-iQ3 analyzer. Before measurement, the samples were degassed in vacuum at  $130^\circ \text{ C}$  for 24 h. The Brunauer-Emmett-Teller (BET) method was utilized to calculate the specific surface areas. By using solid density functional theory (QSDFT), the pore size distribution was derived from the sorption curve. The absorption spectra were recorded on a UV-vis-NIR Lambda 950 spectrophotometer (PerkinElmer, American). The fluorescence measurements were carried out on an F-4600 spectrofluorometer (Lengguang Technology, China).

## Synthetic procedure

Synthesis of 2,7-diamine-10-methyl-phenoxazine (DAPO).<sup>3</sup>

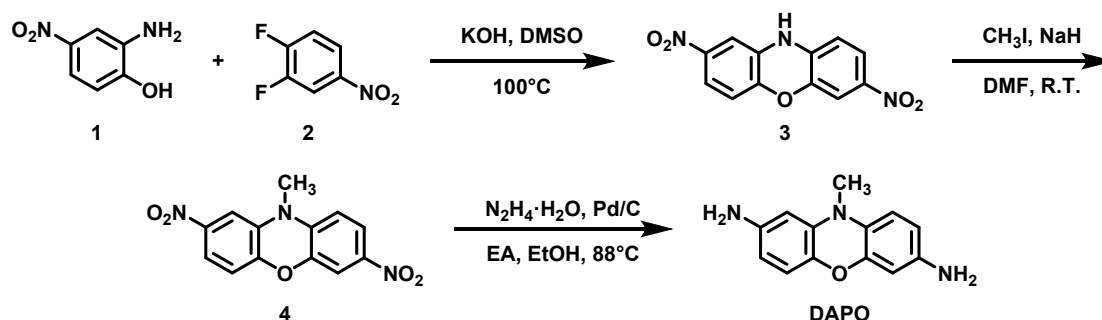

*Synthesis of 2,7-dinitro-10H-phenoxazine (3):* A mixture of 2-amino-4-nitrophenol (154.2 mg, 1 mmol), KOH (1.18 g, 21 mmol) and DMSO (15 mL) was charged in a 250 mL three-necked flask under nitrogen atmosphere, then 3,4-difluoronitrobenzene (1.1 mL, 0.1192 g, 1 mmol) was added dropwise to the reaction mixture and stirred at 100 °C for 24 h. The mixture was quenched using the water (100 mL) with stirring. The crude product was collected by precipitated and washed with water. The crude product was refluxed in chloroform and filtered while it hot and collected the red solid 2,7-dinitro-10H-phenoxazine (2.31 g, 85%). <sup>1</sup>H NMR (400 MHz, DMSO-*d*<sub>6</sub>) δ ppm 9.74 (s, 1H), 7.74 (dd, *J* = 8.8, 2.5 Hz, 1H), 7.58 (dd, *J* = 8.8, 2.7 Hz, 1H), 7.42 (d, *J* = 2.5 Hz, 1H), 7.25 (d, *J* = 2.7 Hz, 1H), 6.85 (d, *J* = 8.8 Hz, 1H), 6.56 (d, *J* = 8.8 Hz, 1H).

*Synthesis of 2,7-dinitro-10-methyl-phenoxazine (4):* A solution of 2,7-dinitro-10H-phenoxazine (2.73 g, 10 mmol) in DMF (60 mL) with CH<sub>3</sub>I (1.22 mL, 2.8 g, 20 mmol) and NaH (0.36 g, 15 mmol) was stirred at room temperature for 20 h. After the complete addition, the water was added to the reaction mixture with stirring. Then the orange color solids precipitated was filtered and washed with water. The solids were dried under reduced pressure to give the pure product as orange color solid (2.71 g, 94%). <sup>1</sup>H NMR (400 MHz, CDCl<sub>3</sub>) δ ppm 7.93 (dd, *J* = 8.9, 2.6 Hz, 1H), 7.81 (dd, *J* = 8.7, 2.5 Hz, 1H), 7.63 (d, *J* = 2.6 Hz, 1H), 7.51 (d, *J* = 2.5 Hz, 1H), 6.85 (d, *J* = 8.7 Hz, 1H), 6.66 (d, *J* = 8.9 Hz, 1H), 3.27 (s, 3H).

*Synthesis of 2,7-diamine-10-methyl-phenoxazine (DAPO):* A mixture of 2,7-dinitro-10-methyl-phenoxazine (862.5 mg, 3 mmol), 10 % Pd/C (70 mg, 90 mmol), N<sub>2</sub>H<sub>4</sub>·H<sub>2</sub>O (5.15 mL), ethyl acetate (10 mL) and ethanol (30 mL) were placed in a hydrothermal reactor and heated to 88 °C for 24 h. The reaction mixture was then filtered to remove the Pd/C, and the filtrate was distilled to remove some solvent. The precipitate was collected dried under vacuum and deperated by silica gel column using

EA:PE = 1.5:1 as eluent under nitrogen atmosphere to give the pure product DAPO (260.2 mg, 38.2%).

$^1\text{H NMR}$  (400 MHz,  $\text{DMSO-}d_6$ )  $\delta$  ppm 6.41 (d,  $J = 8.4$  Hz, 1H), 6.39 (d,  $J = 8.4$  Hz, 1H), 6.08 (dd,  $J = 8.4, 2.4$  Hz, 1H), 6.03 (d,  $J = 2.4$  Hz, 1H), 5.94 (d,  $J = 2.4$  Hz, 1H), 5.83 (dd,  $J = 8.4, 2.4$  Hz, 1H), 4.66 (s, 2H), 4.63 (s, 2H), 2.89 (s, 3H).

*Synthesis of 2,4,6-tris(4-formylphenyl)benzene (TFPB).*

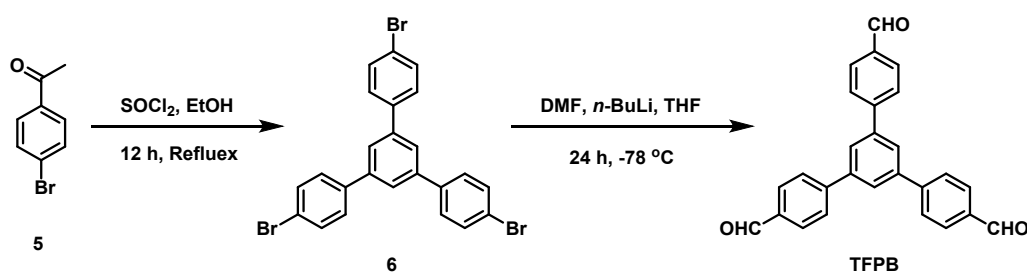

*Synthesis of 2,4,6-tris(4-bromophenyl)benzene (5):* A 100 mL two-neck flask was charged with 4-bromoacetophenone (10 g, 50.2 mmol) in dry ethanol (30 mL) in an ice bath at nitrogen atmosphere. The flask was connected to a reflux condenser and the exhaust was filtered through an alkaline water solution. Under vigorous stirring thionyl chloride (16.4 g, 10 mL, 138 mmol) was added via a dropping funnel over 1 h. The solution naturally warm up to ambient temperature and stirred overnight at  $60^\circ\text{C}$ . Afterwards, the suspension was cooled in an ice bath and water (20 mL) was added carefully while stirring. The precipitate was collected and washed with water and hot ethanol, until the filtrate remained colorless. Drying under reduced pressure afforded 2,4,6-tris(4-bromophenyl)benzene (TFPB, 6.7 g, 73%).  $^1\text{H NMR}$  ( $\text{CDCl}_3$ , 400 MHz)  $\delta$  ppm 7.69 (s, 3H), 7.61 (d,  $J = 8.5$  Hz, 6H), 7.53 (d,  $J = 8.5$  Hz, 6H).

*Synthesis of 2,4,6-tris(4-formylphenyl)benzene (TFPB):* A solution of 2,4,6-tris(4-bromophenyl)benzene (740 mg, 1.36 mmol) in THF (100 mL) was stirred at  $-78^\circ\text{C}$  under dry  $\text{N}_2$  and treated dropwise with a solution of  $n\text{-BuLi}$  (2.5 M in hexane, 3.2 mL, 8.16 mmol). The temperature risen to  $-60^\circ\text{C}$  and stirred for 3 h obtaining green solution and then DMF (1.26 mL, 16.32 mmol) was added dropwise. The mixture was stirred overnight while the temperature risen to  $25^\circ\text{C}$ . The milky opaque mixture was added 2 M aqueous HCl, and the volatiles were partially removed by evaporation under reduced pressure. The remaining aqueous concentrate was extracted with  $\text{CH}_2\text{Cl}_2$ , and the combined organic extracts were washed with water and brine, and dried over  $\text{MgSO}_4$ , and filtered. Volatiles were removed by evaporation under reduced pressure, and the crude yellow product was

further purified by silica gel column using  $\text{CH}_2\text{Cl}_2$ :PE = 4:1 as eluent to afford colorless crystals TFPB (200 mg, 33%).  $^1\text{H}$  NMR (400 MHz,  $\text{CDCl}_3$ )  $\delta$  ppm 10.11 (s, 3H), 8.03 (d,  $J$  = 8.3 Hz, 6H), 7.91 (s, 3H), 7.88 (d,  $J$  = 8.3 Hz, 6H).

*Synthesis of 2,4,6-tris(4-formylphenyl)triazine (TFPT).*

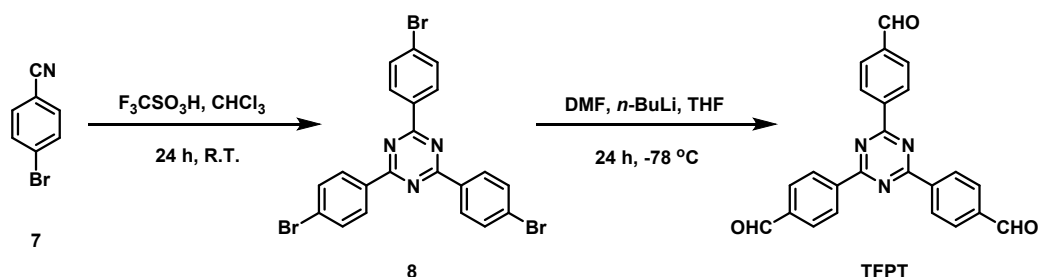

*Synthesis of 2,4,6-tris(4-bromolphenyl)triazine<sup>4</sup>:* 4-bromobenzonitrile (3.0 g, 16.5 mmol) mixed in  $\text{CHCl}_3$  (40 mL) at  $0^\circ\text{C}$ . A  $\text{CHCl}_3$  solution (30 mL) containing  $\text{CF}_3\text{SO}_3\text{H}$  (8 mL, 89 mmol) was added slowly at  $0^\circ\text{C}$ . The solution was stirred at room temperature for 20 h. The reaction was poured into ice water and then quenched by addition of  $\text{NaHCO}_3$  aqueous solution. Then the formed precipitate was collected by filtration and washed with water and  $\text{CH}_3\text{OH}$ . After vacuum drying, 2,4,6-tris(4-bromolphenyl)triazine was provided (2.03 g, 66%).  $^1\text{H}$  NMR (400 MHz,  $\text{CDCl}_3$ )  $\delta$  ppm 8.61 (d,  $J$  = 8.3 Hz, 6H), 7.71 (d,  $J$  = 8.3 Hz, 6H).

*Synthesis of 2,4,6-tris(4-formylphenyl)triazine (TFPT):* Into a Schlenk tube containing 2,4,6-tris(4-bromolphenyl)triazine (817 mg, 1.5 mmol), and THF (100 mL),  $n\text{-BuLi}$  (3.6 mL, 9 mmol) was added slowly at  $-78^\circ\text{C}$ . The solution was stirred for 3 h at  $-60^\circ\text{C}$ , and was added DMF (1.38 mL, 18 mmol). The mixture was stirred overnight while the temperature risen to  $25^\circ\text{C}$ . The resultant reaction mixture was stirred for 2 h. The mixture was added 2 M HCl, and the volatiles were partially removed by evaporation under reduced pressure. The remaining aqueous concentrate was extracted with  $\text{CH}_2\text{Cl}_2$ . The combined organic extracts were washed with water and brine, and dried over  $\text{MgSO}_4$ , and filtered. Volatiles were removed by evaporation under reduced pressure, and the crude light-yellow product was further depurated by recrystallization using  $\text{CH}_2\text{Cl}_2$ . The desired product was purified by column chromatography ( $\text{CH}_2\text{Cl}_2$ : PE = 2:1), and was obtained as the white solid TFPT (213 mg, 36%).  $^1\text{H}$  NMR (400 MHz,  $\text{CDCl}_3$ )  $\delta$  ppm 10.20 (s, 3H), 8.96 (d,  $J$  = 8.2 Hz, 6H), 8.13 (d,  $J$  = 8.2 Hz, 6H).

*Synthesis of TFPT-DAPO-COF.*

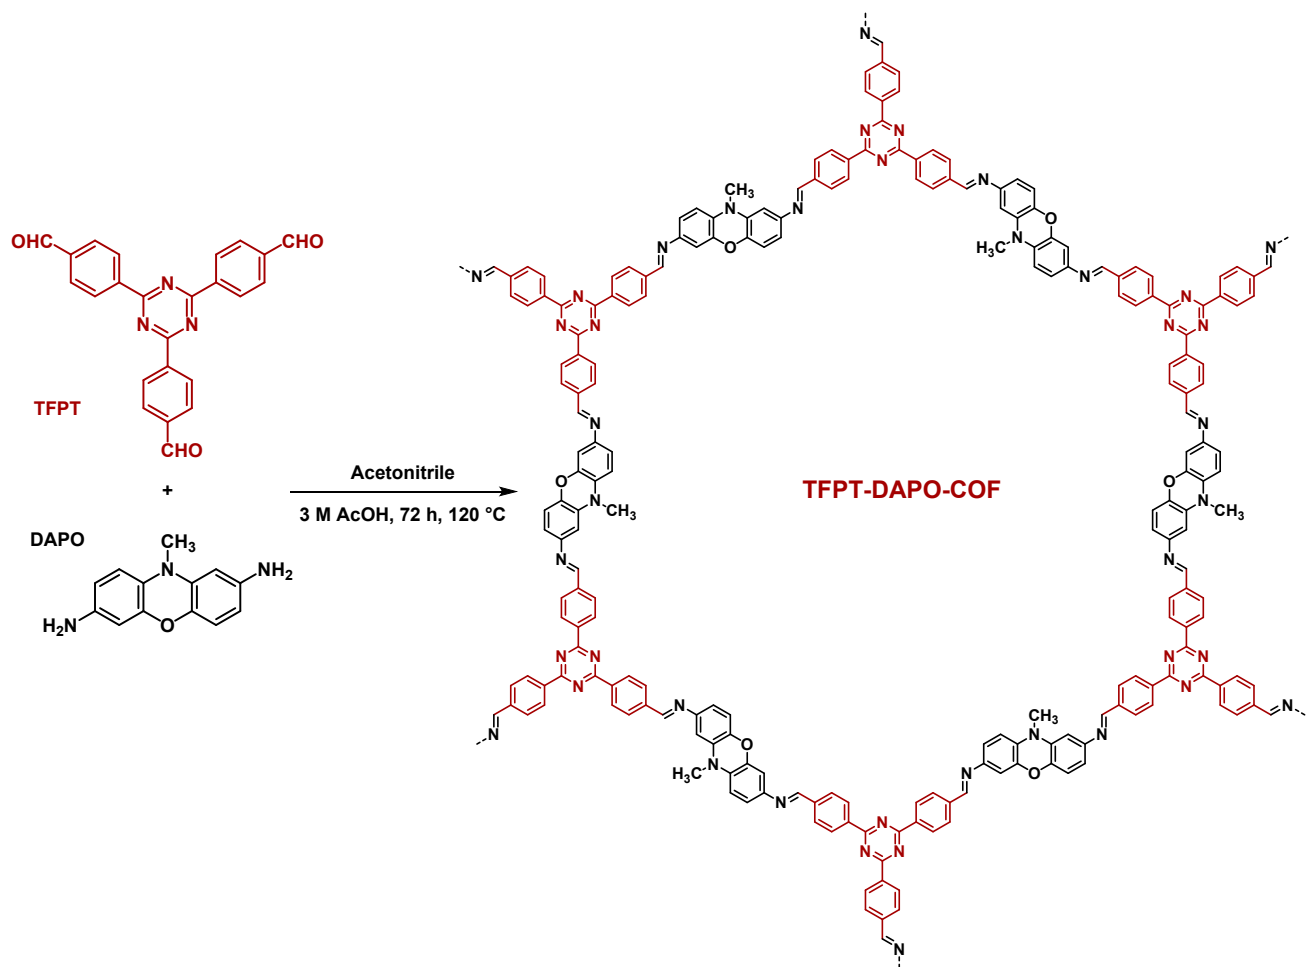

A 10 mL Schlenk tube was charged with 2,7-diamine-10-methyl-phenoxazine (DAPO, 10.2 mg, 0.045 mmol), 2,4,6-tris(4-formylphenyl)triazine (TFPT, 11.8 mg, 0.03 mmol) and CH<sub>3</sub>CN (1 mL). The mixture was sonicated for 10 min to get a homogenous dispersion. Then, AcOH (3 M, 0.3 mL) was added and the vial was degassed by three freeze-pump-thaw cycles, sealed under vacuum, and heated left undisturbed for 3 days at 120 °C. The yielded brown precipitate was centrifugation and washed with DMF and THF, separately. The collected powder was dried at 110 °C under vacuum for 12 h to give red powder (18 mg, 88%).

## Synthesis of TFPB-DAPO-COF.

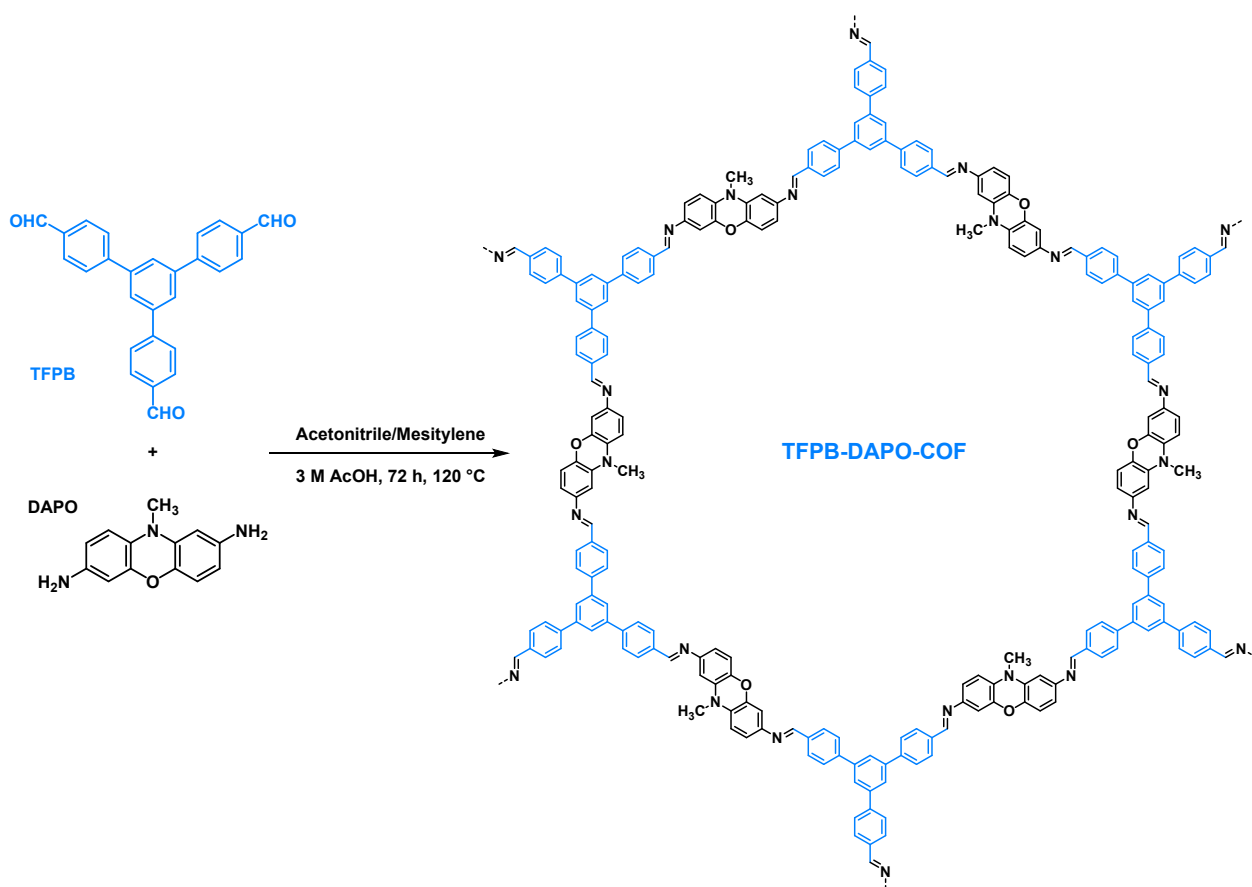

A 10 mL Schlenk tube was charged with 2,7-diamine-10-methyl-phenoxazine (DAPO, 20.4 mg, 0.09 mmol), 2,4,6-tris(4-formylphenyl)benzene (TFPB, 23.4 mg, 0.06 mmol) and CH<sub>3</sub>CN/Mesitylene (1:1 v/v, 2 mL). The mixture was sonicated for 10 min to get a homogenous dispersion. Then, AcOH (3 M, 0.6 mL) was added and the vial was degassed by three freeze-pump-thaw cycles, sealed under vacuum, and heated left undisturbed for 3 days at 120 °C. The yielded brown precipitate was centrifugation and washed with DMF and THF, separately. The collected powder was dried at 110 °C under vacuum for 24 h to give a yellow powder with (34 mg, 84%).

### Detection of water in organic solvents

A certain amount of TFPT-DAPO-COF (1.000 mg) was ultrasonically dispersed in 10 mL of organic solvent, different volumes of water were added into this suspension. A 1 mL sample of the above-obtained solution was added to a clean quartz cell (1 × 1 cm<sup>2</sup>) with slight shaking. The corresponding fluorescence spectra upon excitation at 507 nm were recorded.

### The relationship between the quenching rate and water content

From the results of the fluorescence spectra, we estimated the ability of the COFs in detecting trace amount of water in organic solvents by using the Stern-Volmer equation shown below:

$$I_0/I = 1 + K[Q]$$

where K was the quenching constant; [Q] was the volume percentage of water;  $I_0$  was the initial luminescent intensity of luminescence material in organic solvent without water and I was the luminescent intensity of the luminescence material in organic solvent with different contents of water.

The detection limit calculated by:

$$LOD = 3S/K$$

where S is the standard deviation for THF solution of COF without adding water; K is the quenching constant, which was obtained by the slope of the Stern-Volmer curve at low water content.

### Supporting figure

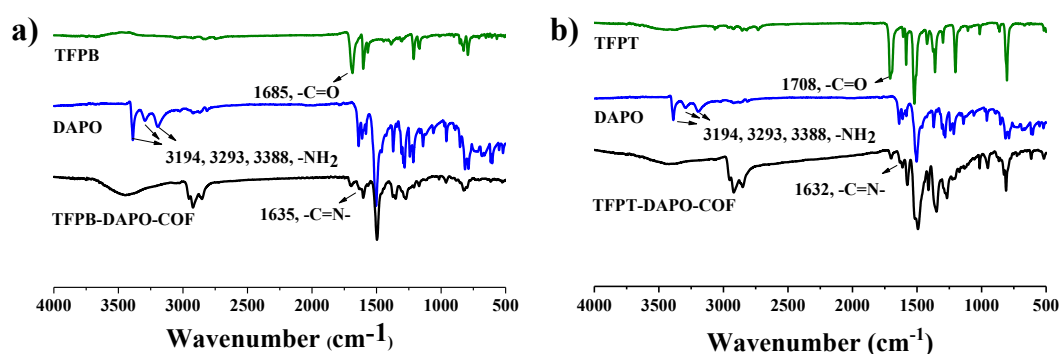

**Figure S1.** a) FT-IR spectra of TFPB (green), DAPO (blue) and TFPB-DAPO-COF (black); b) FT-IR spectra of TFPT (green), DAPO (blue) and TFPT-DAPO-COF (black).



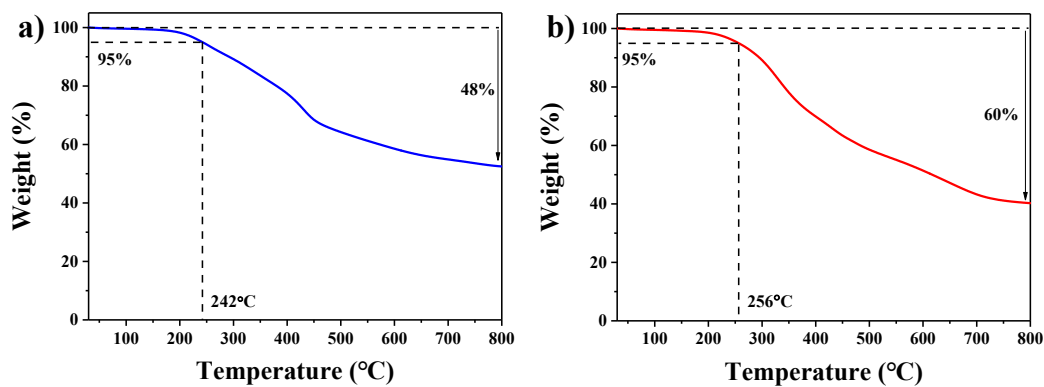

**Figure S2.** Thermogravimetric analysis of (a) TFPB-DAPO-COF and (b) TFPT-DAPO-COF under a nitrogen atmosphere with a heating rate of 10 °C/min.

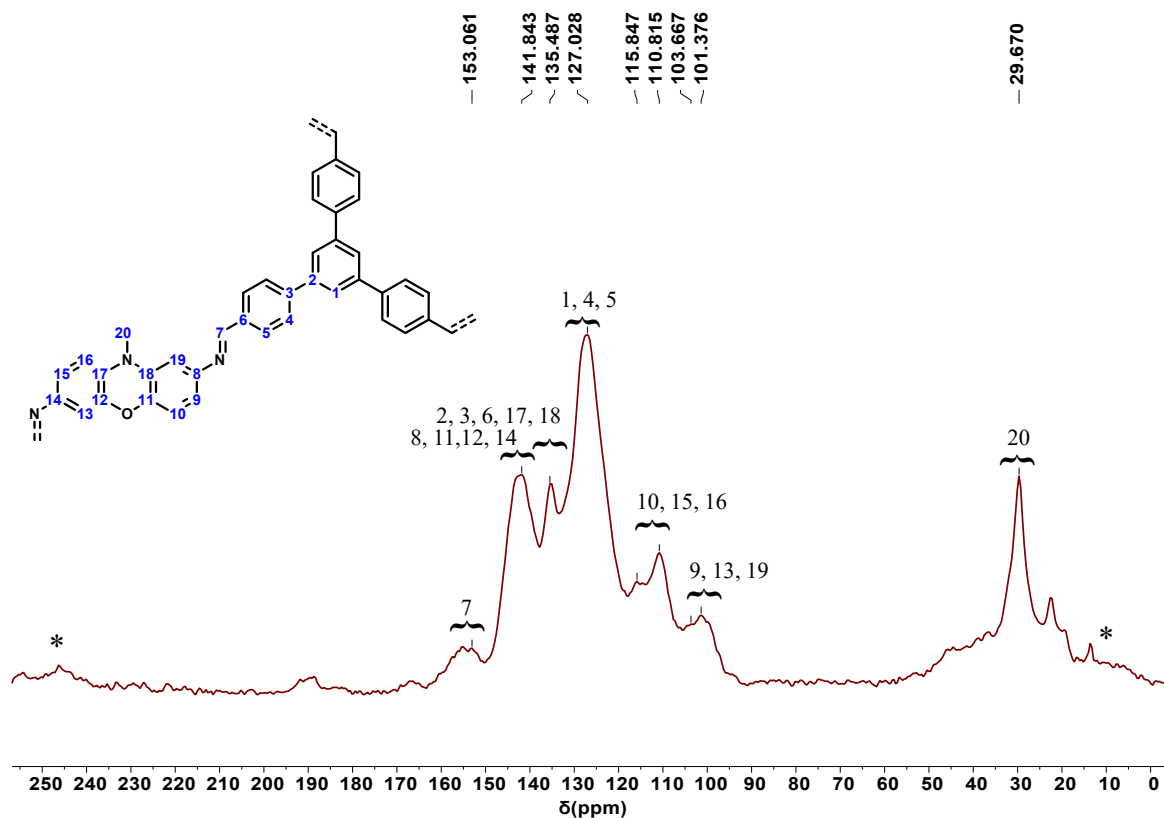

**Figure S3.** Solid-state  $^{13}\text{C}$  NMR spectra and peak assignment for TFPB-DAPO-COF.

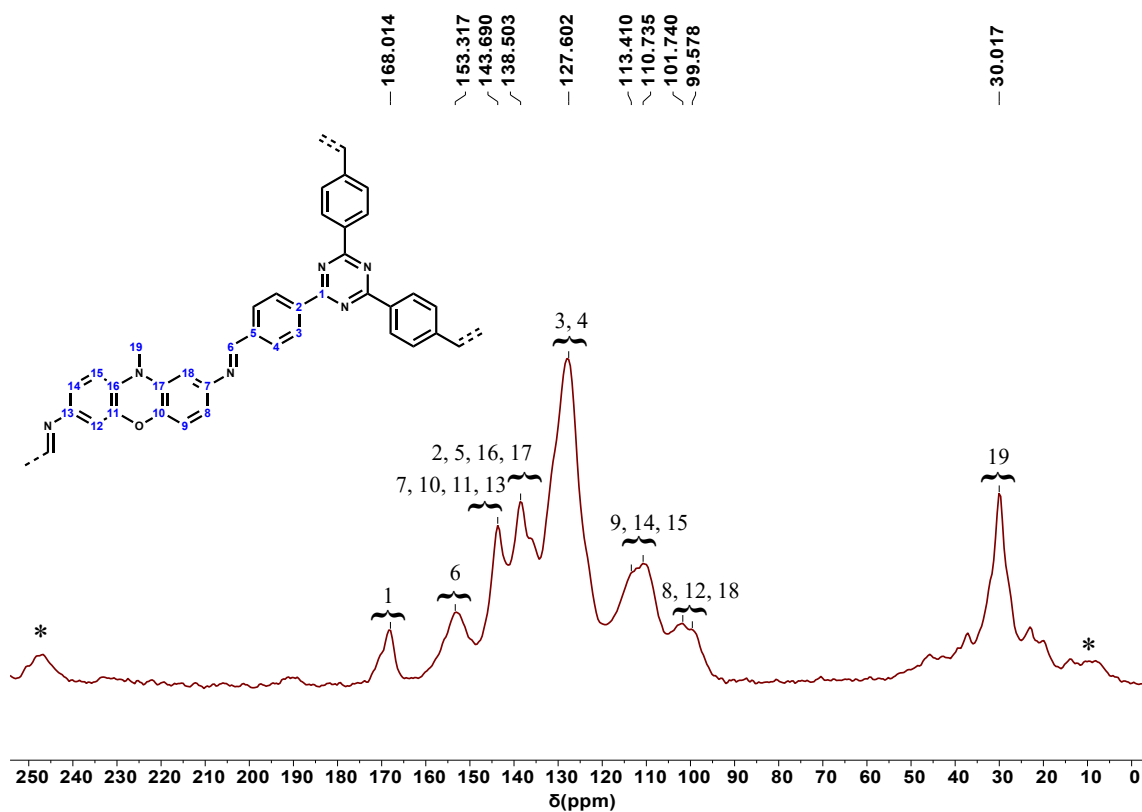

**Figure S4.** Solid-state  $^{13}\text{C}$  NMR spectra and peak assignment for TFPT-DAPO-COF.

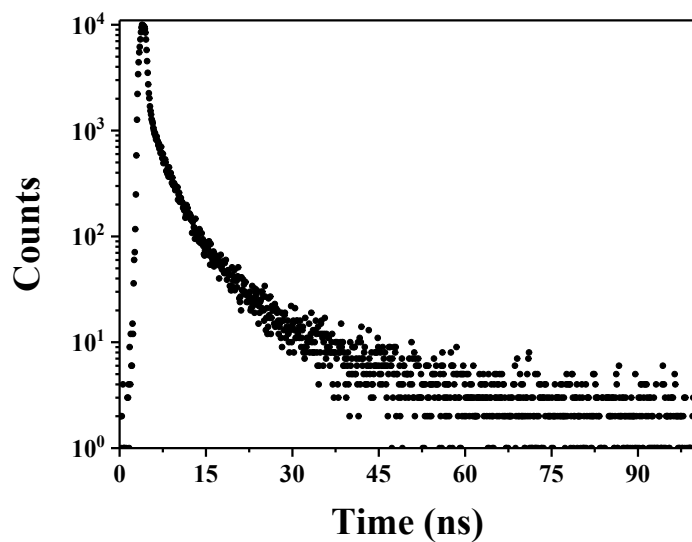

**Figure S5.** Photoluminescence decay curves of TFPT-DAPO-COF at room temperature.

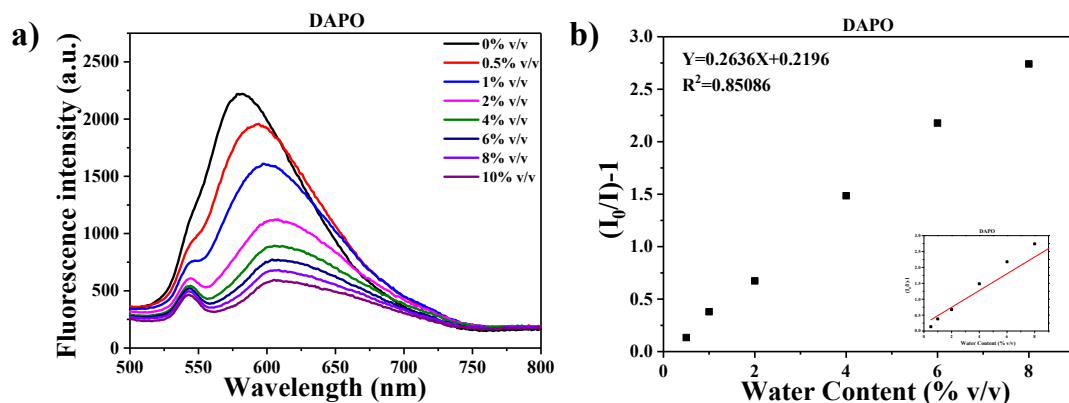

**Figure S6.** a) Fluorescence spectra of DAPO in THF with different water content (0-10% v/v); b) The linear correlation between the fluorescence of DAPO in THF and different water contents (0-10% v/v); The inset shows the linear correlation between 0-10% v/v.

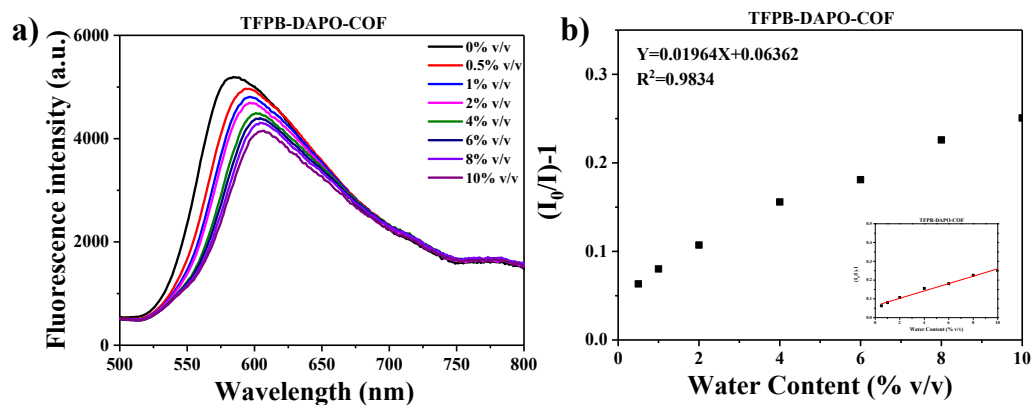

**Figure S7.** a) Fluorescence spectra of TFPB-DAPO-COF in THF with different water content (0-10% v/v); b) The linear correlation between the fluorescence of TFPB-DAPO-COF in THF and different water contents (0-10% v/v); The inset shows the linear correlation between 0-10% v/v.

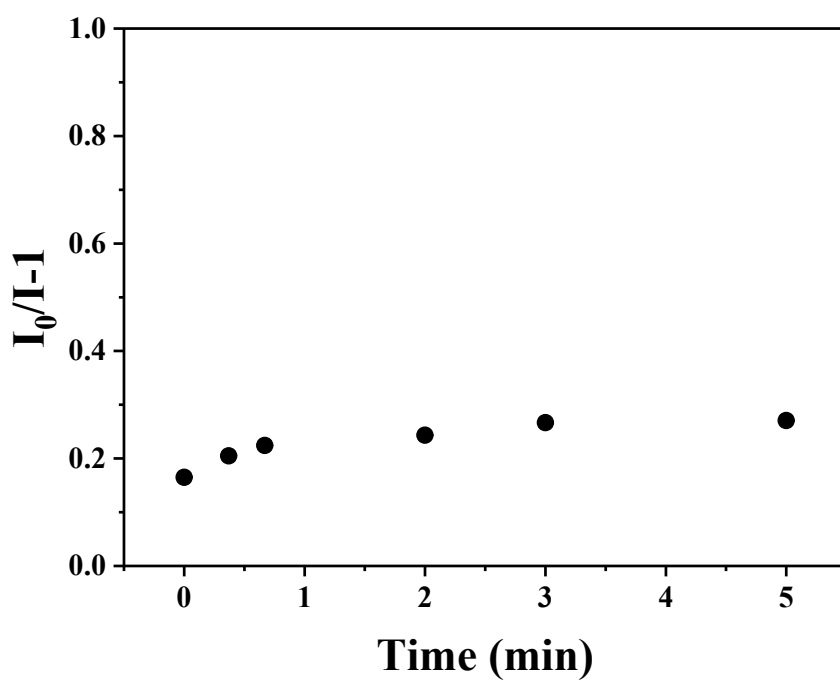

**Figure S8.** Effect of ultrasonication time on ( $I_0/I-1$ ) of TFPT-DAPO-COF in THF with 1 wt% water.

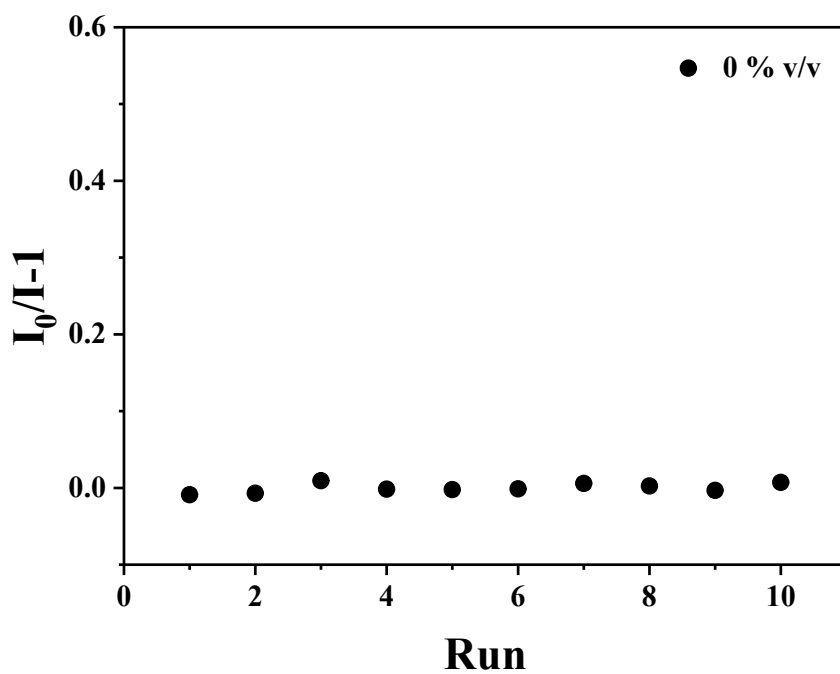

**Figure S9.** Relative standard deviations on ( $I_0/I-1$ ) of TFPT-DAPO-COF for 10 replicate detections with 0% water in THF.

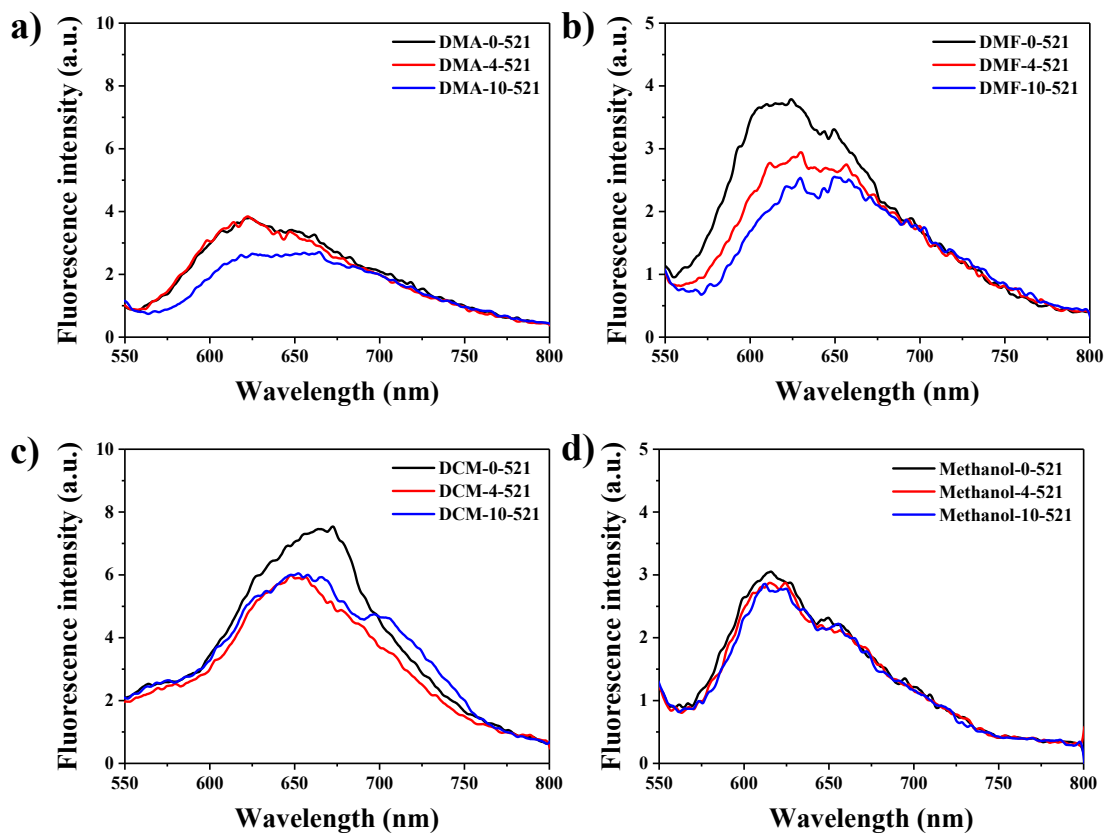

**Figure S10.** Under the excitation wavelength of 521nm, Fluorescence emission spectra of TFPT-DAPO-COF in some kinds of organic solvents with different water content (0-10% v/v), a) DMA; b) DMF; c) DCM; d) Methanol

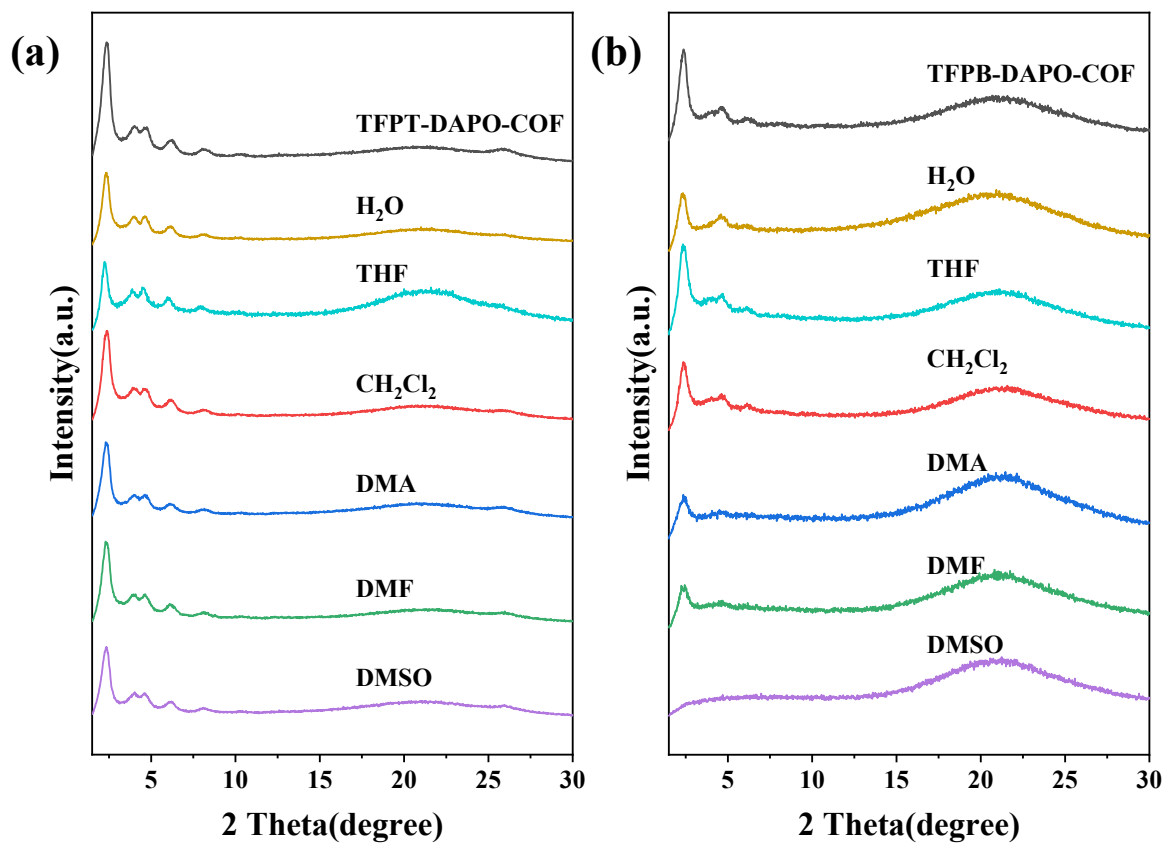

**Figure S11.** Chemical stability tests of the (a)TFPT-DAPO-COF and (b) TFPB-DAPO-COF. The samples were each exposed to identical conditions for 24 h (10 mg COFs in 4 mL solvents).

## Supporting tables

**Table S1.** Various probes for sensing water in organic solvent.

| Materials                   | solvents           | Linear range                                      | LOD                          | Ref.             |
|-----------------------------|--------------------|---------------------------------------------------|------------------------------|------------------|
| GSH-L-CuNCs                 | DMF                | $1.4 \times 10^{-3}$ - $1.0 \times 10^{-2}$ % v/v | $4.2 \times 10^{-4}$ % v/v   | 5                |
|                             | CH <sub>3</sub> CN | $7.0 \times 10^{-4}$ - $1.0 \times 10^{-2}$ % v/v | $2.0 \times 10^{-4}$ % v/v   |                  |
|                             | THF                | $5.0 \times 10^{-4}$ - $1.0 \times 10^{-2}$ % v/v | $1.6 \times 10^{-4}$ % v/v   |                  |
| Tb <sup>3+</sup> @p-CDs/MOF | EtOH               | 0-30 % v/v                                        | $2.8 \times 10^{-10}$ % v/v  | 6                |
|                             | DMF                | 0-30 % v/v                                        | $3.3 \times 10^{-10}$ % v/v  |                  |
|                             | Cyclopropane       | 0-40 % v/v                                        | $2.5 \times 10^{-10}$ % v/v  |                  |
| o-CDs                       | Acetone            | /                                                 | $1.9 \times 10^{-10}$ % v/v  | 7                |
|                             | THF                | /                                                 | $1.3 \times 10^{-10}$ % v/v  |                  |
|                             | CH <sub>3</sub> CN | /                                                 | $1.8 \times 10^{-10}$ % v/v  |                  |
| Eu-MOF                      | DMF                | $5.0 \times 10^{-2}$ -6% v/v                      | $2.0 \times 10^{-20}$ % v/v  | 8                |
| TzDa                        | IPA                | 1.1-7.7% wt                                       | $8.5 \times 10^{-20}$ wt     | 9                |
|                             | Acetone            | 0.1-5.1 % wt                                      | $2.2 \times 10^{-20}$ wt     |                  |
|                             | THF                | 0.5-5.1% wt                                       | $2.6 \times 10^{-20}$ wt     |                  |
|                             | Ethanol            | 0.4-2.5% wt                                       | $3.4 \times 10^{-20}$ wt     |                  |
|                             | EA                 | 0.6-3.2% wt                                       | $6.0 \times 10^{-30}$ wt     |                  |
| TAPT-BMTA-COF               | CH <sub>3</sub> CN | 0.33-5% v/v                                       | $1.2 \times 10^{-10}$ % v/v  | 10               |
| DAPO                        | THF                | 1-8% v/v                                          | $7.4 \times 10^{-20}$ % v/v  | <i>This work</i> |
| TFPB-DAPO-COF               | THF                | 1-8% v/v                                          | 3.2% v/v                     |                  |
| TFPT-DAPO-COF               | THF                | 0.1-0.4% v/v                                      | $6.56 \times 10^{-20}$ % v/v |                  |

**Table S2.** Fractional atomic coordinates for the unit cell of TFPT-DAPO-COF with AA stacking.

| <i>P6/m</i>                                                                                                              |                 |                 |                 |             |                 |                 |                 |
|--------------------------------------------------------------------------------------------------------------------------|-----------------|-----------------|-----------------|-------------|-----------------|-----------------|-----------------|
| $a = 45.630 \text{ \AA}, b = 45.595 \text{ \AA}, c = 2.00 \text{ \AA}, \alpha = \beta = 90^\circ, \gamma = 59.934^\circ$ |                 |                 |                 |             |                 |                 |                 |
| <b>Atom</b>                                                                                                              | <b><i>x</i></b> | <b><i>y</i></b> | <b><i>z</i></b> | <b>Atom</b> | <b><i>x</i></b> | <b><i>y</i></b> | <b><i>z</i></b> |
| H1                                                                                                                       | 6.45107         | -5.30600        | 0.00000         | C25         | 6.51550         | -5.19438        | 0.00000         |
| H2                                                                                                                       | 6.47244         | -5.26323        | 0.00000         | C26         | 6.52740         | -5.17074        | 0.00000         |
| H3                                                                                                                       | 6.36571         | -5.17778        | 0.00000         | C27         | 6.50360         | -5.13490        | 0.00000         |
| H4                                                                                                                       | 6.34434         | -5.22055        | 0.00000         | C28         | 6.46790         | -5.12292        | 0.00000         |
| H5                                                                                                                       | 6.38030         | -5.39912        | 0.00000         | C29         | 6.45599         | -5.14678        | 0.00000         |
| H6                                                                                                                       | 6.42306         | -5.46316        | 0.00000         | C30         | 6.57476         | -5.15873        | 0.00000         |
| H7                                                                                                                       | 6.50839         | -5.44180        | 0.00000         | C31         | 6.55095         | -5.12289        | 0.00000         |
| H8                                                                                                                       | 6.46563         | -5.37777        | 0.00000         | C32         | 6.50385         | -5.55152        | 0.00000         |
| H9                                                                                                                       | 6.28723         | -5.23485        | 0.00000         | C33         | 6.49195         | -5.57516        | 0.00000         |
| H10                                                                                                                      | 6.22299         | -5.21358        | 0.00000         | C34         | 6.51576         | -5.61100        | 0.00000         |
| H11                                                                                                                      | 6.24441         | -5.32025        | 0.00000         | C35         | 6.55146         | -5.62276        | 0.00000         |
| H12                                                                                                                      | 6.30850         | -5.34177        | 0.00000         | C36         | 6.56336         | -5.59912        | 0.00000         |
| H13                                                                                                                      | 6.41328         | -5.16591        | 0.00000         | C37         | 6.53956         | -5.56328        | 0.00000         |
| H14                                                                                                                      | 6.52031         | -5.50158        | 0.00000         | C38         | 6.52766         | -5.67048        | 0.00000         |
| H15                                                                                                                      | 6.53438         | -5.22276        | 0.00000         | C39         | 6.56336         | -5.68224        | 0.00000         |
| H16                                                                                                                      | 6.44902         | -5.09454        | 0.00000         | C40         | 6.51576         | -5.69412        | 0.00000         |
| H17                                                                                                                      | 6.42765         | -5.13731        | 0.00000         | C41         | 6.53956         | -5.72996        | 0.00000         |
| H18                                                                                                                      | 6.46360         | -5.56563        | 0.00000         | C42         | 6.57526         | -5.74172        | 0.00000         |
| H19                                                                                                                      | 6.59172         | -5.60865        | 0.00000         | C43         | 6.58717         | -5.71808        | 0.00000         |
| H20                                                                                                                      | 6.54906         | -5.54443        | 0.00000         | C44         | 6.61046         | -5.17071        | 0.00000         |
| H21                                                                                                                      | 6.48740         | -5.68459        | 0.00000         | C45         | 6.62236         | -5.14685        | 0.00000         |
| H22                                                                                                                      | 6.53005         | -5.74880        | 0.00000         | C46         | 6.59856         | -5.11123        | 0.00000         |
| H23                                                                                                                      | 6.61552         | -5.72761        | 0.00000         | C47         | 6.56286         | -5.09925        | 0.00000         |
| H24                                                                                                                      | 6.62934         | -5.19909        | 0.00000         | C48         | 6.64617         | -5.09935        | 0.00000         |
| H25                                                                                                                      | 6.65071         | -5.15632        | 0.00000         | C49         | 6.65807         | -5.07549        | 0.00000         |



|     |         |          |          |     |         |          |         |
|-----|---------|----------|----------|-----|---------|----------|---------|
| H26 | 6.54398 | -5.07087 | 0.00000  | C50 | 6.69377 | -5.08747 | 0.00000 |
| H27 | 6.66505 | -5.12773 | 0.00000  | C51 | 6.70567 | -5.06361 | 0.00000 |
| H28 | 6.71265 | -5.11585 | 0.00000  | C52 | 6.68187 | -5.02798 | 0.00000 |
| H29 | 6.73402 | -5.07307 | 0.00000  | C53 | 6.64617 | -5.01600 | 0.00000 |
| H30 | 6.62729 | -4.98762 | 0.00000  | C54 | 6.63427 | -5.03987 | 0.00000 |
| H31 | 6.60592 | -5.03040 | 0.00000  | C55 | 6.69352 | -5.00400 | 0.00000 |
| H32 | 6.69806 | -4.89450 | 0.00000  | C56 | 6.74113 | -4.99212 | 0.00000 |
| H33 | 6.65530 | -4.83047 | 0.00000  | C57 | 6.68162 | -4.94452 | 0.00000 |
| H34 | 6.56996 | -4.85182 | 0.00000  | C58 | 6.65782 | -4.90889 | 0.00000 |
| H35 | 6.61273 | -4.91586 | 0.00000  | C59 | 6.66972 | -4.88503 | 0.00000 |
| H36 | 6.55807 | -4.79239 | 0.00000  | C60 | 6.64591 | -4.84941 | 0.00000 |
| H37 | 6.79113 | -5.05878 | 0.00000  | C61 | 6.61021 | -4.83743 | 0.00000 |
| H38 | 6.85537 | -5.08004 | 0.00000  | C62 | 6.59831 | -4.86129 | 0.00000 |
| H39 | 6.83394 | -4.97337 | 0.00000  | C63 | 6.62211 | -4.89691 | 0.00000 |
| H40 | 6.76971 | -4.95211 | 0.00000  | C64 | 6.58641 | -4.80181 | 0.00000 |
| H41 | 6.89342 | -5.02117 | 0.00000  | C65 | 6.77683 | -5.00410 | 0.00000 |
| H42 | 6.95788 | -5.14220 | 0.00000  | C66 | 6.80063 | -5.03994 | 0.00000 |
| H43 | 7.00044 | -5.05682 | 0.00000  | C67 | 6.83634 | -5.05170 | 0.00000 |
| H44 | 6.93648 | -5.03540 | 0.00000  | C68 | 6.84824 | -5.02806 | 0.00000 |
| H45 | 7.07677 | -5.23752 | 0.00000  | C69 | 6.82444 | -4.99222 | 0.00000 |
| H46 | 7.14078 | -5.25865 | 0.00000  | C70 | 6.78873 | -4.98046 | 0.00000 |
| H47 | 7.11933 | -5.15199 | 0.00000  | C71 | 6.88395 | -5.04004 | 0.00000 |
| H48 | 7.18363 | -5.27312 | 0.00000  | C72 | 6.94345 | -5.08764 | 0.00000 |
| H49 | 6.61914 | -5.66732 | -0.52032 | C73 | 6.96726 | -5.12326 | 0.00000 |
| H50 | 6.62535 | -5.69853 | 0.14376  | C74 | 7.00296 | -5.13524 | 0.00000 |
| H51 | 6.61677 | -5.65540 | 0.37656  | C75 | 7.01486 | -5.11138 | 0.00000 |
| H52 | 6.46679 | -5.07048 | 0.24141  | C76 | 6.99106 | -5.07576 | 0.00000 |
| H53 | 6.48631 | -5.06553 | -0.53651 | C77 | 6.95536 | -5.06378 | 0.00000 |
| H54 | 6.50227 | -5.06149 | 0.29509  | C78 | 7.06247 | -5.18284 | 0.00000 |
| H55 | 7.03086 | -5.21635 | 0.35897  | C79 | 7.07412 | -5.15885 | 0.00000 |

|     |         |          |          |     |         |          |         |
|-----|---------|----------|----------|-----|---------|----------|---------|
| H56 | 7.01703 | -5.20527 | -0.52583 | C80 | 7.08627 | -5.21868 | 0.00000 |
| H57 | 6.98727 | -5.18144 | 0.16686  | C81 | 7.12173 | -5.23032 | 0.00000 |
| C1  | 6.39674 | -5.34911 | 0.00000  | C82 | 7.13363 | -5.20667 | 0.00000 |
| C2  | 6.38484 | -5.28963 | 0.00000  | C83 | 7.10982 | -5.17083 | 0.00000 |
| C3  | 6.33723 | -5.30151 | 0.00000  | C84 | 7.19313 | -5.25428 | 0.00000 |
| C4  | 6.30153 | -5.28953 | 0.00000  | C85 | 6.61097 | -5.67058 | 0.00000 |
| C5  | 6.42054 | -5.38473 | 0.00000  | C86 | 6.49145 | -5.07529 | 0.00000 |
| C6  | 6.39649 | -5.26564 | 0.00000  | C87 | 7.01486 | -5.19472 | 0.00000 |
| C7  | 6.43219 | -5.27762 | 0.00000  | N1  | 6.36103 | -5.33713 | 0.00000 |
| C8  | 6.44409 | -5.25376 | 0.00000  | N2  | 6.40864 | -5.32525 | 0.00000 |
| C9  | 6.42029 | -5.21814 | 0.00000  | N3  | 6.34913 | -5.27765 | 0.00000 |
| C10 | 6.38458 | -5.20616 | 0.00000  | N4  | 6.46790 | -5.20626 | 0.00000 |
| C11 | 6.37268 | -5.23002 | 0.00000  | N5  | 6.51550 | -5.11126 | 0.00000 |
| C12 | 6.40864 | -5.40859 | 0.00000  | N6  | 6.48005 | -5.51568 | 0.00000 |
| C13 | 6.43244 | -5.44421 | 0.00000  | N7  | 6.57526 | -5.65860 | 0.00000 |
| C14 | 6.46815 | -5.45619 | 0.00000  | N8  | 6.61046 | -5.08737 | 0.00000 |
| C15 | 6.48005 | -5.43233 | 0.00000  | N9  | 6.72922 | -5.01598 | 0.00000 |
| C16 | 6.45625 | -5.39671 | 0.00000  | N10 | 6.71732 | -4.95650 | 0.00000 |
| C17 | 6.27772 | -5.25369 | 0.00000  | N11 | 6.66972 | -4.96838 | 0.00000 |
| C18 | 6.24202 | -5.24193 | 0.00000  | N12 | 6.90775 | -5.07566 | 0.00000 |
| C19 | 6.23012 | -5.26557 | 0.00000  | N13 | 7.02677 | -5.17086 | 0.00000 |
| C20 | 6.25392 | -5.30141 | 0.00000  | N14 | 7.16933 | -5.21843 | 0.00000 |
| C21 | 6.28962 | -5.31339 | 0.00000  | N15 | 6.59907 | -5.77756 | 0.00000 |
| C22 | 6.43219 | -5.19428 | 0.00000  | O1  | 6.56311 | -5.18250 | 0.00000 |
| C23 | 6.49195 | -5.49203 | 0.00000  | O2  | 6.50385 | -5.63464 | 0.00000 |
| C24 | 6.47980 | -5.18240 | 0.00000  | O3  | 7.05032 | -5.12323 | 0.00000 |

**Table S3.** Fractional atomic coordinates for the unit cell of TFPB-DAPO-COF with AA stacking.

| <i>P6/m</i>                                                                                   |         |          |         |      |         |          |         |
|-----------------------------------------------------------------------------------------------|---------|----------|---------|------|---------|----------|---------|
| a = 45.630 Å, b = 45.598 Å, c = 2.00 Å, $\alpha = \beta = 90^\circ$ , $\gamma = 59.926^\circ$ |         |          |         |      |         |          |         |
| Atom                                                                                          | x       | y        | z       | Atom | x       | y        | z       |
| H1                                                                                            | 7.24546 | -6.78679 | 0.00000 | C22  | 7.12407 | -6.69633 | 0.00000 |
| H2                                                                                            | 7.33072 | -6.76544 | 0.00000 | C23  | 7.14788 | -6.73195 | 0.00000 |
| H3                                                                                            | 7.22382 | -6.67996 | 0.00000 | C24  | 7.18359 | -6.74394 | 0.00000 |
| H4                                                                                            | 7.34519 | -6.73654 | 0.00000 | C25  | 7.32616 | -6.62508 | 0.00000 |
| H5                                                                                            | 7.36643 | -6.69409 | 0.00000 | C26  | 7.38568 | -6.92248 | 0.00000 |
| H6                                                                                            | 7.25953 | -6.60860 | 0.00000 | C27  | 7.37352 | -6.61308 | 0.00000 |
| H7                                                                                            | 7.23829 | -6.65105 | 0.00000 | C28  | 7.40923 | -6.62506 | 0.00000 |
| H8                                                                                            | 7.27400 | -6.82949 | 0.00000 | C29  | 7.42113 | -6.60120 | 0.00000 |
| H9                                                                                            | 7.31666 | -6.89371 | 0.00000 | C30  | 7.39733 | -6.56558 | 0.00000 |
| H10                                                                                           | 7.40212 | -6.87247 | 0.00000 | C31  | 7.36162 | -6.55360 | 0.00000 |
| H11                                                                                           | 7.35935 | -6.80843 | 0.00000 | C32  | 7.34972 | -6.57745 | 0.00000 |
| H12                                                                                           | 7.18081 | -6.66539 | 0.00000 | C33  | 7.46874 | -6.58933 | 0.00000 |
| H13                                                                                           | 7.11684 | -6.64396 | 0.00000 | C34  | 7.44494 | -6.55371 | 0.00000 |
| H14                                                                                           | 7.13850 | -6.75089 | 0.00000 | C35  | 7.39758 | -6.98196 | 0.00000 |
| H15                                                                                           | 7.20247 | -6.77232 | 0.00000 | C36  | 7.38593 | -7.00594 | 0.00000 |
| H16                                                                                           | 7.30730 | -6.59669 | 0.00000 | C37  | 7.40974 | -7.04156 | 0.00000 |
| H17                                                                                           | 7.41401 | -6.93190 | 0.00000 | C38  | 7.44519 | -7.05342 | 0.00000 |
| H18                                                                                           | 7.42811 | -6.65344 | 0.00000 | C39  | 7.45709 | -7.02956 | 0.00000 |
| H19                                                                                           | 7.34274 | -6.52522 | 0.00000 | C40  | 7.43329 | -6.99394 | 0.00000 |
| H20                                                                                           | 7.32137 | -6.56798 | 0.00000 | C41  | 7.42164 | -7.10104 | 0.00000 |
| H21                                                                                           | 7.35762 | -6.99665 | 0.00000 | C42  | 7.45735 | -7.11303 | 0.00000 |
| H22                                                                                           | 7.48544 | -7.03903 | 0.00000 | C43  | 7.40974 | -7.12490 | 0.00000 |
| H23                                                                                           | 7.44267 | -6.97500 | 0.00000 | C44  | 7.43354 | -7.16052 | 0.00000 |
| H24                                                                                           | 7.38139 | -7.11543 | 0.00000 | C45  | 7.46925 | -7.17251 | 0.00000 |
| H25                                                                                           | 7.42416 | -7.17946 | 0.00000 | C46  | 7.48115 | -7.14865 | 0.00000 |

|     |         |          |          |     |         |          |         |
|-----|---------|----------|----------|-----|---------|----------|---------|
| H26 | 7.50950 | -7.15812 | 0.00000  | C47 | 7.50445 | -6.60132 | 0.00000 |
| H27 | 7.52333 | -6.62970 | 0.00000  | C48 | 7.51635 | -6.57746 | 0.00000 |
| H28 | 7.54470 | -6.58693 | 0.00000  | C49 | 7.49255 | -6.54184 | 0.00000 |
| H29 | 7.43796 | -6.50147 | 0.00000  | C50 | 7.45684 | -6.52985 | 0.00000 |
| H30 | 7.55881 | -6.55821 | 0.00000  | C51 | 7.53990 | -6.52984 | 0.00000 |
| H31 | 7.60654 | -6.54631 | 0.00000  | C52 | 7.55181 | -6.50620 | 0.00000 |
| H32 | 7.62778 | -6.50386 | 0.00000  | C53 | 7.58751 | -6.51797 | 0.00000 |
| H33 | 7.52088 | -6.41838 | 0.00000  | C54 | 7.59942 | -6.49433 | 0.00000 |
| H34 | 7.49964 | -6.46082 | 0.00000  | C55 | 7.57561 | -6.45849 | 0.00000 |
| H35 | 7.64210 | -6.47522 | 0.00000  | C56 | 7.53990 | -6.44672 | 0.00000 |
| H36 | 7.62083 | -6.36830 | 0.00000  | C57 | 7.52800 | -6.47036 | 0.00000 |
| H37 | 7.53535 | -6.38947 | 0.00000  | C58 | 7.58751 | -6.43485 | 0.00000 |
| H38 | 7.59207 | -6.32542 | 0.00000  | C59 | 7.62322 | -6.44683 | 0.00000 |
| H39 | 7.54941 | -6.26121 | 0.00000  | C60 | 7.63512 | -6.42298 | 0.00000 |
| H40 | 7.46395 | -6.28245 | 0.00000  | C61 | 7.61132 | -6.38713 | 0.00000 |
| H41 | 7.50672 | -6.34648 | 0.00000  | C62 | 7.57561 | -6.37537 | 0.00000 |
| H42 | 7.45205 | -6.22302 | 0.00000  | C63 | 7.56371 | -6.39901 | 0.00000 |
| H43 | 7.68526 | -6.48952 | 0.00000  | C64 | 7.55181 | -6.33953 | 0.00000 |
| H44 | 7.74923 | -6.51095 | 0.00000  | C65 | 7.56371 | -6.31589 | 0.00000 |
| H45 | 7.72757 | -6.40402 | 0.00000  | C66 | 7.53990 | -6.28005 | 0.00000 |
| H46 | 7.66383 | -6.38273 | 0.00000  | C67 | 7.50420 | -6.26806 | 0.00000 |
| H47 | 7.78718 | -6.45171 | 0.00000  | C68 | 7.49229 | -6.29192 | 0.00000 |
| H48 | 7.85151 | -6.57286 | 0.00000  | C69 | 7.51610 | -6.32754 | 0.00000 |
| H49 | 7.89433 | -6.48747 | 0.00000  | C70 | 7.48039 | -6.23244 | 0.00000 |
| H50 | 7.83009 | -6.46620 | 0.00000  | C71 | 7.67083 | -6.43496 | 0.00000 |
| H51 | 7.97066 | -6.66818 | 0.00000  | C72 | 7.69464 | -6.47058 | 0.00000 |
| H52 | 8.03463 | -6.68960 | 0.00000  | C73 | 7.73035 | -6.48257 | 0.00000 |
| H53 | 8.01323 | -6.58280 | 0.00000  | C74 | 7.74199 | -6.45859 | 0.00000 |
| H54 | 8.07779 | -6.70391 | 0.00000  | C75 | 7.71819 | -6.42296 | 0.00000 |
| H55 | 7.51287 | -7.09777 | -0.52032 | C76 | 7.68274 | -6.41110 | 0.00000 |

|     |         |          |          |     |         |          |         |
|-----|---------|----------|----------|-----|---------|----------|---------|
| H56 | 7.51909 | -7.12898 | 0.14376  | C77 | 7.77770 | -6.47057 | 0.00000 |
| H57 | 7.51050 | -7.08585 | 0.37656  | C78 | 7.83722 | -6.51818 | 0.00000 |
| H58 | 7.36077 | -6.50127 | 0.24158  | C79 | 7.86102 | -6.55402 | 0.00000 |
| H59 | 7.38028 | -6.49635 | -0.53652 | C80 | 7.89673 | -6.56579 | 0.00000 |
| H60 | 7.39627 | -6.49232 | 0.29493  | C81 | 7.90863 | -6.54215 | 0.00000 |
| H61 | 7.92463 | -6.64694 | 0.35819  | C82 | 7.88483 | -6.50631 | 0.00000 |
| H62 | 7.91072 | -6.63577 | -0.52605 | C83 | 7.84912 | -6.49454 | 0.00000 |
| H63 | 7.88105 | -6.61194 | 0.16785  | C84 | 7.95624 | -6.61361 | 0.00000 |
| C1  | 7.25475 | -6.76778 | 0.00000  | C85 | 7.96814 | -6.58976 | 0.00000 |
| C2  | 7.29046 | -6.77955 | 0.00000  | C86 | 7.98005 | -6.64924 | 0.00000 |
| C3  | 7.30236 | -6.75591 | 0.00000  | C87 | 8.01575 | -6.66122 | 0.00000 |
| C4  | 7.27855 | -6.72007 | 0.00000  | C88 | 8.02766 | -6.63736 | 0.00000 |
| C5  | 7.24285 | -6.70830 | 0.00000  | C89 | 8.00385 | -6.60174 | 0.00000 |
| C6  | 7.23094 | -6.73194 | 0.00000  | C90 | 8.08717 | -6.68497 | 0.00000 |
| C7  | 7.19524 | -6.71995 | 0.00000  | C91 | 7.50470 | -7.10103 | 0.00000 |
| C8  | 7.31426 | -6.81539 | 0.00000  | C92 | 7.38542 | -6.50610 | 0.00000 |
| C9  | 7.29046 | -6.69643 | 0.00000  | C93 | 7.90863 | -6.62527 | 0.00000 |
| C10 | 7.32616 | -6.70819 | 0.00000  | N1  | 7.36162 | -6.63693 | 0.00000 |
| C11 | 7.33807 | -6.68456 | 0.00000  | N2  | 7.40923 | -6.54172 | 0.00000 |
| C12 | 7.31426 | -6.64871 | 0.00000  | N3  | 7.37377 | -6.94633 | 0.00000 |
| C13 | 7.27855 | -6.63695 | 0.00000  | N4  | 7.46900 | -7.08904 | 0.00000 |
| C14 | 7.26665 | -6.66059 | 0.00000  | N5  | 7.50445 | -6.51798 | 0.00000 |
| C15 | 7.30236 | -6.83903 | 0.00000  | N6  | 7.80151 | -6.50619 | 0.00000 |
| C16 | 7.32616 | -6.87487 | 0.00000  | N7  | 7.92053 | -6.60163 | 0.00000 |
| C17 | 7.36187 | -6.88685 | 0.00000  | N8  | 8.06336 | -6.64935 | 0.00000 |
| C18 | 7.37377 | -6.86300 | 0.00000  | N9  | 7.49305 | -7.20813 | 0.00000 |
| C19 | 7.34997 | -6.82737 | 0.00000  | O1  | 7.45684 | -6.61319 | 0.00000 |
| C20 | 7.17143 | -6.68433 | 0.00000  | O2  | 7.39783 | -7.06542 | 0.00000 |
| C21 | 7.13572 | -6.67234 | 0.00000  | O3  | 7.94434 | -6.55413 | 0.00000 |

**Table S4.** Elemental analysis of the TFPT-DAPO-COF and TFPB-DAPO-COF.

| Sample        | Expected<br>C% | Expected<br>H% | Expected<br>N% | Found<br>C% | Found<br>H% | Found<br>N% |
|---------------|----------------|----------------|----------------|-------------|-------------|-------------|
| TFPB-DAPO-COF | 82.34          | 4.83           | 9.29           | 77.40       | 6.52        | 5.42        |
| TFPT-DAPO-COF | 76.69          | 4.63           | 15.42          | 77.36       | 7.74        | 8.88        |

**Reference**

1. Lange, R. Z.; Hofer, G.; Weber, T.; Schlüter, A. D., *J. Am. Chem. Soc.*, **2017**, *139* (5), 2053-2059.
2. Liu, Z.; Su, Q.; Ju, P.; Li, X.; Li, G.; Wu, Q.; Yang, B., *Chem. Commun.* **2020**, *56* (5), 766-769.
3. Meng, Z.; Zhang, Y.; Dong, M.; Zhang, Y.; Cui, F.; Loh, T.-P.; Jin, Y.; Zhang, W.; Yang, H.; Du, Y., *J. Mater. Chem. A.*, **2021**, *9* (17), 10661-10665.
4. Nomura, K.; Haque, T.; Miwata, T.; Inagaki, A.; Takamizu, K., *Polym. Chem.*, **2015**, *6* (3), 380-388.
5. Huang, Y.; Liu, W.; Feng, H.; Ye, Y.; Tang, C.; Ao, H.; Zhao, M.; Chen, G.; Chen, J.; Qian, Z., *Anal. Chem.*, **2016**, *88* (14), 7429-7434.
6. Wu, J.-X.; Yan, B., *Dalton T.*, **2017**, *46* (21), 7098-7105.
7. Chao, D.; Lyu, W.; Liu, Y.; Zhou, L.; Zhang, Q.; Deng, R.; Zhang, H., *J. Mater. Chem. C.*, **2018**, *6* (28), 7527-7532.
8. Zhou, Y.; Zhang, D.; Xing, W.; Cuan, J.; Hu, Y.; Cao, Y.; Gan, N., *Anal. Chem.*, **2019**, *91* (7), 4845-4851.
9. Qian, H.-L.; Dai, C.; Yang, C.-X.; Yan, X.-P., *ACS Appl. Mater. Interfaces*, **2017**, *9* (29), 24999-25005.
10. Ma, W.; Jiang, S.; Zhang, W.; Xu, B.; Tian, W., *Macromol. Rapid Commun.*, **2020**, *41* (24), 2000003.
